# Supplementary material
Source: PubMed Central journal article supplement (PMC1449650)
Supplement: pnas_0508863103_2.pdf [file pnas_0508863103_2.pdf]

**Table 3.  $m$  values with errors for S6 wild-type and the circular permutants**

|      | $m_f$ S6 <sup>wt</sup> | $m_u$ S6 <sup>wt</sup> | $m_{D-N}$<br>S6 <sup>wt</sup> | $m_f$ P <sup>13-14</sup> | $m_u$ P <sup>13-14</sup> | $m_{D-N}$ P <sup>13-14</sup> | $m_f$ P <sup>54-55</sup> | $m_u$ P <sup>54-55</sup> | $m_{D-N}$ P <sup>54-55</sup> | $m_f$ P <sup>68-69</sup> | $m_u$ P <sup>68-69</sup> | $m_{D-N}$ P <sup>68-69</sup> |           |
|------|------------------------|------------------------|-------------------------------|--------------------------|--------------------------|------------------------------|--------------------------|--------------------------|------------------------------|--------------------------|--------------------------|------------------------------|-----------|
| WT   | -1.21±0.02             | 0.59±0.04              | 1.80±0.04                     | -1.01±0.05               | 0.64±0.04                | 1.65±0.06                    | -0.93±0.01               | 0.68±0.02                | 1.61±0.02                    | -                        | 1.28±0.02                | 0.62±0.02                    | 1.90±0.03 |
| V6A  | -1.49±0.02             | 0.40±0.01              | 1.89±0.03                     | -1.68±0.19               | 0.72±0.06                | 2.40±0.20                    | -1.23±0.03               | 0.63±0.02                | 1.86±0.04                    | -                        | 1.38±0.04                | 0.72±0.02                    | 2.10±0.04 |
| I8A  | -1.43±0.02             | 0.51±0.01              | 1.93±0.02                     | -1.55±0.49               | 0.79±0.12                | 2.33±0.51                    | -1.11±0.03               | 0.72±0.02                | 1.84±0.03                    | -                        | 1.30±0.04                | 0.79±0.02                    | 2.09±0.04 |
| L19A | -1.41±0.01             | 0.50±0.01              | 1.90±0.02                     | -0.67±0.05               | 1.29±0.10                | 1.96±0.11                    | -0.98±0.02               | 0.67±0.01                | 1.65±0.02                    | -                        | 1.15±0.03                | 0.60±0.02                    | 1.75±0.04 |
| I26A | -1.35±0.01             | 0.65±0.01              | 2.00±0.02                     | -0.97±0.16               | 0.94±0.15                | 1.91±0.22                    | -0.88±0.02               | 0.85±0.03                | 1.73±0.04                    | -                        | 1.22±0.04                | 0.60±0.03                    | 1.82±0.05 |
| L30A | -1.56±0.03             | 0.78±0.03              | 2.34±0.04                     | -1.29±0.27               | 0.95±0.16                | 2.25±0.31                    | -1.07±0.03               | 0.61±0.03                | 1.69±0.04                    | -                        | 1.63±0.07                | 0.62±0.04                    | 2.25±0.08 |
| V37A | -1.42±0.03             | 0.51±0.02              | 1.93±0.03                     | -0.95±0.19               | 0.64±0.07                | 1.59±0.20                    | -0.91±0.03               | 0.50±0.02                | 1.41±0.03                    | -                        | 1.10±0.04                | 0.61±0.03                    | 1.71±0.05 |
| V40A | -1.33±0.02             | 0.59±0.03              | 1.92±0.03                     | -1.08±0.10               | 0.80±0.08                | 1.87±0.13                    | -0.92±0.01               | 0.70±0.02                | 1.62±0.03                    | -                        | 1.25±0.02                | 0.61±0.01                    | 1.86±0.03 |
| L48A | -1.30±0.02             | 0.49±0.03              | 1.78±0.04                     | -0.98±0.04               | 0.71±0.02                | 1.69±0.05                    | -0.98±0.02               | 0.59±0.01                | 1.57±0.03                    | -                        | 1.15±0.02                | 0.56±0.02                    | 1.71±0.03 |
| F60A | -1.36±0.02             | 0.44±0.03              | 1.80±0.03                     | -1.14±0.06               | 0.56±0.02                | 1.70±0.06                    | -0.93±0.01               | 0.63±0.02                | 1.56±0.02                    | -                        | 1.22±0.02                | 0.56±0.02                    | 1.78±0.03 |

|      | $m_f S6^{wt}$ | $m_u S6^{wt}$ | $m_{D-N} S6^{wt}$ | $m_f P^{13-14}$ | $m_u P^{13-14}$ | $m_{D-N} P^{13-14}$ | $m_f P^{54-55}$ | $m_u P^{54-55}$ | $m_{D-N} P^{54-55}$ | $m_f P^{68-69}$ | $m_u P^{68-69}$ | $m_{D-N} P^{68-69}$ |           |
|------|---------------|---------------|-------------------|-----------------|-----------------|---------------------|-----------------|-----------------|---------------------|-----------------|-----------------|---------------------|-----------|
| L61A | -1.53±0.02    | 0.54±0.01     | 2.07±0.02         | n.d.            | n.d.            | n.d.                | -1.02±0.03      | 0.59±0.02       | 1.61±0.04           | -               | 1.37±0.07       | 0.46±0.02           | 1.83±0.08 |
| Y63A | -1.61±0.02    | 0.50±0.01     | 2.11±0.02         | -0.89±0.04      | 0.83±0.04       | 1.71±0.05           | -1.04±0.04      | 0.58±0.03       | 1.62±0.04           | -               | 1.29±0.05       | 0.57±0.02           | 1.86±0.05 |
| V65A | -1.55±0.02    | 0.58±0.02     | 2.13±0.03         | -0.89±0.16      | 0.74±0.05       | 1.63±0.17           | -1.04±0.04      | 0.54±0.02       | 1.58±0.05           | -               | 1.17±0.08       | 0.60±0.05           | 1.76±0.10 |
| V72A | -1.31±0.01    | 0.52±0.02     | 1.83±0.02         | -1.11±0.11      | 0.51±0.04       | 1.63±0.12           | -0.88±0.02      | 0.68±0.03       | 1.56±0.04           | -               | 1.14±0.03       | 0.72±0.05           | 1.86±0.06 |
| L75A | -1.38±0.02    | 0.50±0.03     | 1.89±0.03         | -1.24±0.03      | 0.61±0.02       | 1.85±0.04           | -1.15±0.06      | 0.63±0.04       | 1.79±0.07           | -               | 1.13±0.04       | 0.77±0.03           | 1.90±0.05 |
| L79A | -1.45±0.03    | 0.53±0.02     | 1.98±0.03         | n.d.            | n.d.            | n.d.                | -1.15±0.04      | 0.78±0.02       | 1.93±0.04           | -               | 1.25±0.07       | 0.75±0.02           | 2.00±0.07 |
| V85A | -1.30±0.01    | 0.48±0.01     | 1.79±0.01         | -1.02±0.09      | 0.61±0.04       | 1.63±0.10           | -1.07±0.03      | 0.73±0.02       | 1.80±0.04           | -               | 1.14±0.05       | 0.69±0.03           | 1.83±0.06 |
| V88A | -1.18±0.02    | 0.39±0.02     | 1.57±0.03         | -1.14±0.08      | 0.64±0.02       | 1.78±0.09           | -1.11±0.04      | 0.75±0.03       | 1.86±0.05           | -               | 1.27±0.02       | 0.66±0.02           | 1.94±0.03 |
| V90A | -1.30±0.02    | 0.33±0.02     | 1.63±0.02         | -1.42±0.16      | 0.75±0.04       | 2.17±0.16           | -1.22±0.04      | 0.65±0.03       | 1.87±0.05           | -               | 1.20±0.04       | 0.64±0.03           | 1.84±0.05 |

Units are in  $M^{-1}$  according to Eq. 2 and  $m_{D-N} = m_u - m_f$ ; n.d., not determined.
