# Supplementary material
Source: PubMed Central journal article supplement (PMC1449650)
Supplement: pnas_0508863103_4.pdf [file pnas_0508863103_4.pdf]

**Table 5.  $\Delta L^{\text{mean}}$  and  $\Delta\phi$  for  $\alpha$ -spectrin SH3 permutants**

| <b>D48G</b> | $\phi$ | $L^{\text{mean}}$ | <b>S19-<br/>P20</b> | $\phi$    | $\Delta\phi$ | $L^{\text{mean}}$ | $\Delta L^{\text{mean}}$ | <b>N47-<br/>D48</b> | $\phi$    | $\Delta\phi$ | $L^{\text{mean}}$ | $\Delta L^{\text{mean}}$ |
|-------------|--------|-------------------|---------------------|-----------|--------------|-------------------|--------------------------|---------------------|-----------|--------------|-------------------|--------------------------|
| L8S         | 0.16   | 33.94             | L52S                | 0.18      | 0.02         | 20.11             | 13.83                    | L21S                | 0.39      | 0.23         | 15.8              | 18.14                    |
| V23A        | 0.32   | 24.65             | V6A                 | 0.23      | -<br>0.09    | 27.91             | -3.26                    | V36A                | 0.27      | -0.05        | 27.35             | -2.7                     |
| T24A        | 0.29   | n.d.              | T7A                 | 0.5       | 0.21         | n.d.              | n.d.                     | T37A                | 0.23      | -0.06        | n.d.              | n.d.                     |
| L33V        | -0.2   | 18.29             | L16V                | -<br>0.25 | -<br>0.05    | 21.04             | -2.75                    | L46V                | -<br>0.05 | 0.15         | 18.39             | -0.1                     |
| S36N        | 0.25   | n.d.              | S19N                | 0.27      | 0.02         | n.d.              | n.d.                     | S49N                | 0.42      | 0.17         | n.d.              | n.d.                     |
| K43A        | 0.26   | 8.51              | K26A                | 0         | -<br>0.26    | 11.67             | -3.16                    | K56A                | -0.1      | -0.36        | 35.86             | -27.35                   |
| V44A        | 0.48   | 14.69             | V27A                | 0.18      | -0.3         | 13.55             | 1.14                     | V57A                | 0.04      | -0.44        | 29.94             | -15.25                   |
| V53A        | 0.61   | 21.74             | V36A                | -         |              | 17.62             | 4.12                     | V5A                 | 0.45      | -0.16        | 34.75             | -13.01                   |

$\phi$ -Values for  $\alpha$ -spectrin Src homology 3 were taken from table 1 in ref. 1, and values for the permutants were from bar graphs in ref. 2. n.d., not determined because the calculations of  $L^{\text{mean}}$  are based only on deleted contacts between carbon-carbon atoms.

1. Martinez, J. C. & Serrano, L. (1999) *Nat. Struct. Biol.* **6**, 1010-1016.

2. Viguera, A. R., Serrano, L. & Wilmanns, M. (1996) *Nat. Struct. Biol.* **3**, 874-880.
