# Supplementary material
Source: PubMed Central journal article supplement (PMC1449650)

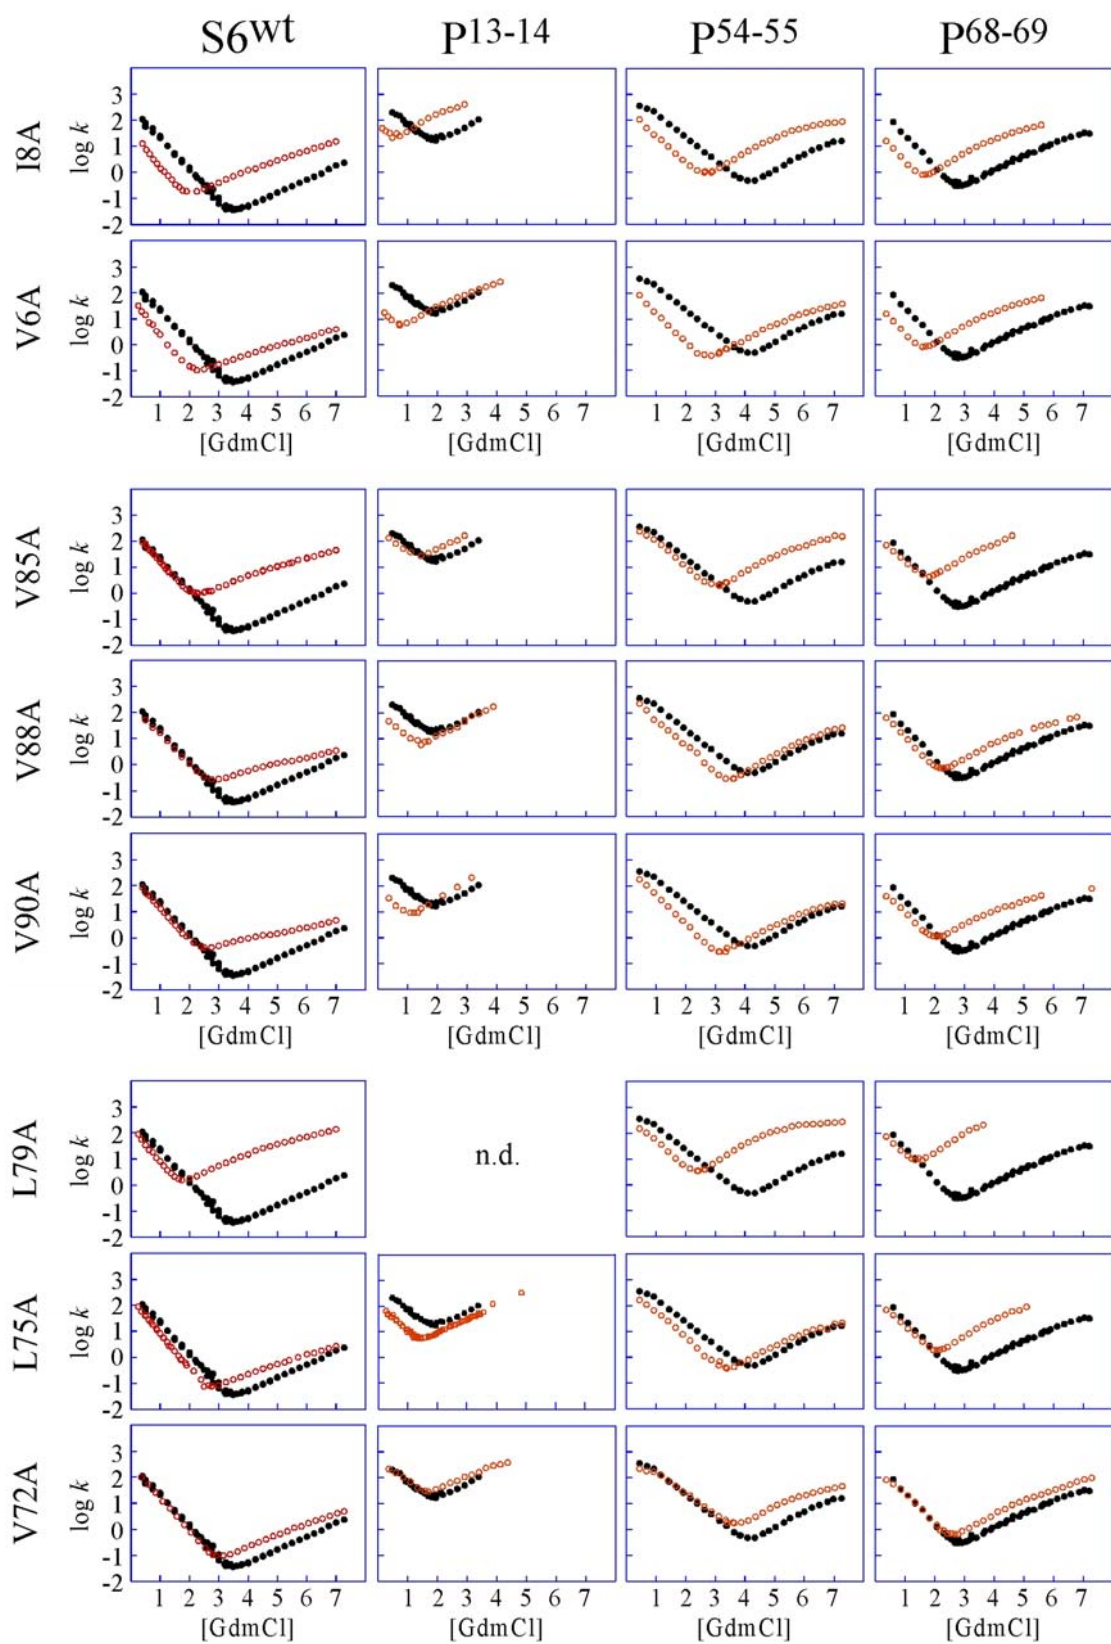

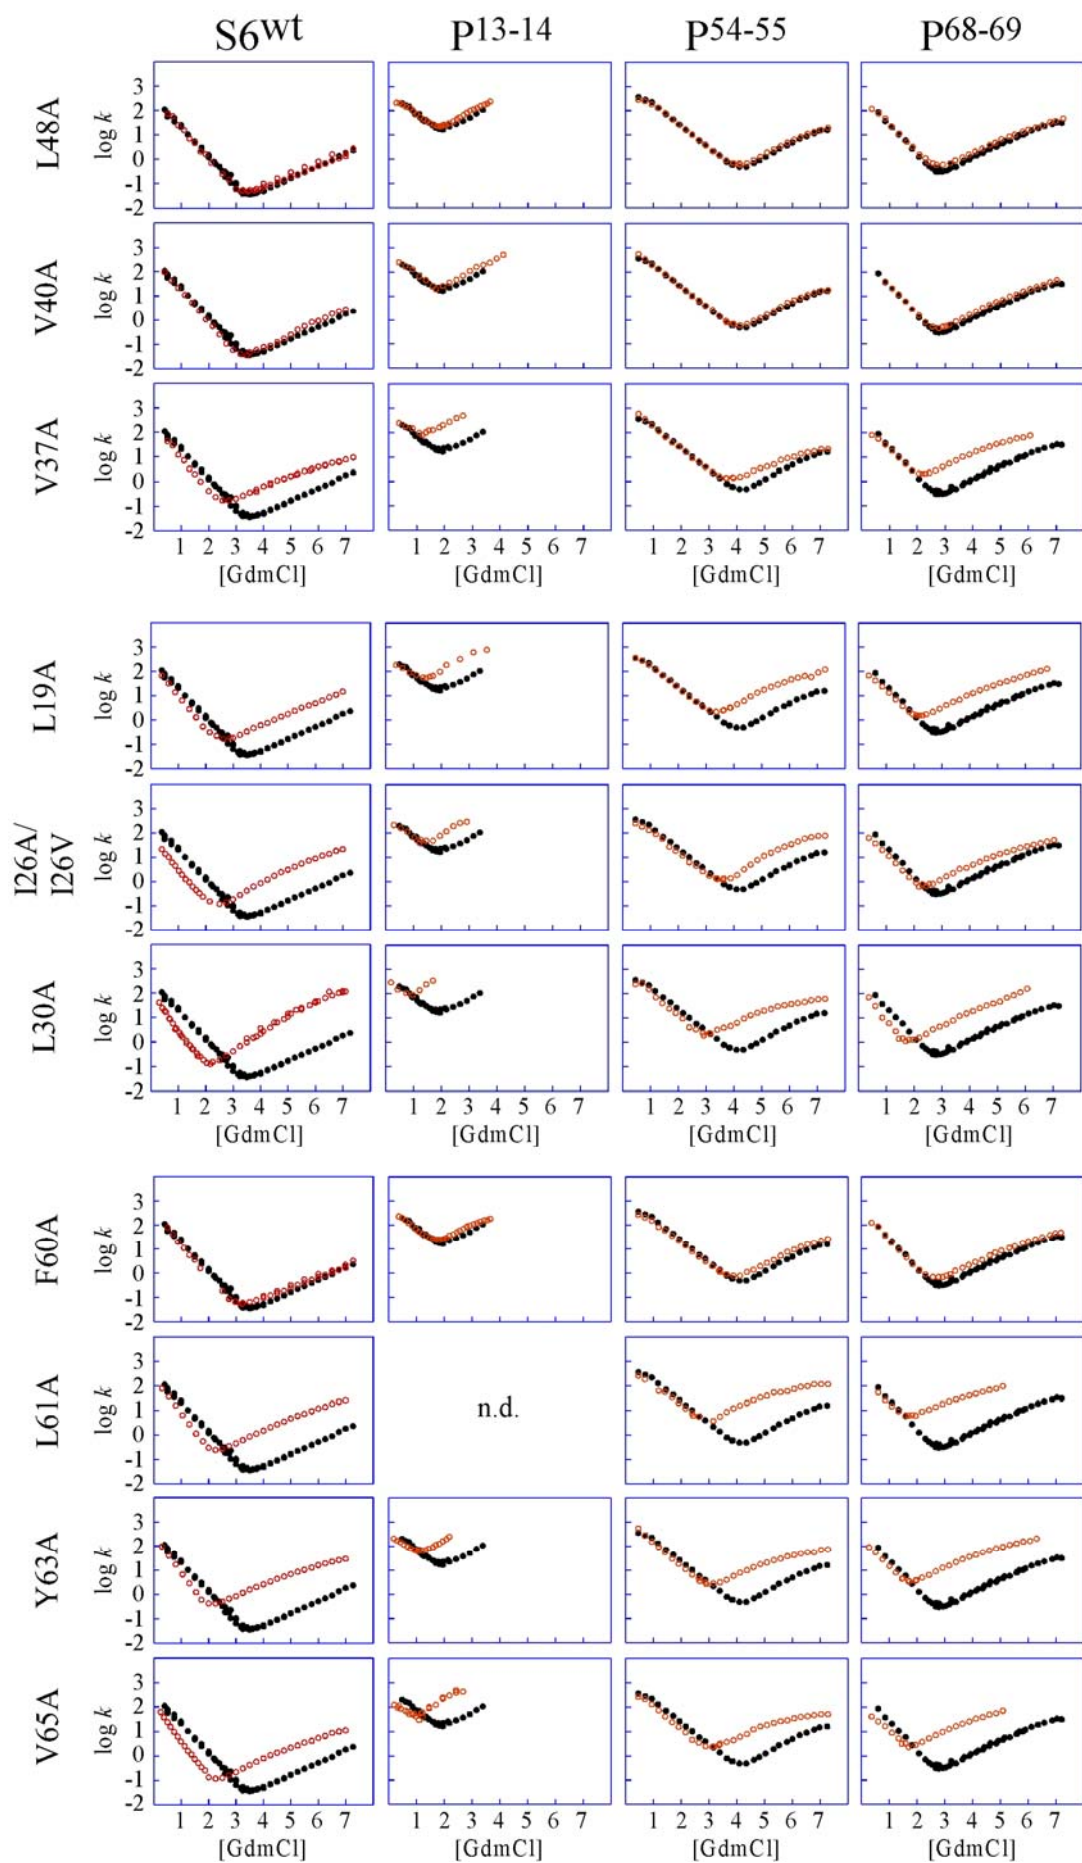

Supplement: pnas_0508863103_1.pdf [file pnas_0508863103_1.pdf]
